# Supplementary material
Source: MDPI journal article supplement (https://www.mdpi.com/2073-4395/14/4/875)
Supplement: s1 [file s1]

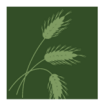

**Supplemental Table S1.** Plant-parasitic nematode taxa (including species name and authority where known), and the average and range of population densities across all treatments at harvest at Lewiston-Woodville and Rocky Mount in 2013, 2019, and 2022.

|              |                                     | Population of plant-parasitic nematodes in soil at peanut harvest (range) |               |                |             |                  |                  |
|--------------|-------------------------------------|---------------------------------------------------------------------------|---------------|----------------|-------------|------------------|------------------|
| Nematode     | Genus, species, and authority       | Lewiston-Woodville                                                        |               |                | Rocky Mount |                  |                  |
|              |                                     | 2013                                                                      | 2019          | 2022           | 2013        | 2019             | 2022             |
|              |                                     | No./500 cm <sup>3</sup>                                                   |               |                |             |                  |                  |
| Dagger       | <i>Xiphinema</i> spp.               | -                                                                         | 2 (0-20)      | 19 (0-670)     | 1 (0-10)    | 4 (0-20)         | 5 (0-80)         |
| Lesion       | <i>Pratylenchus</i> spp.            | 14 (0-70)                                                                 | 39 (0-560)    | 13 (0-110)     | 10 (0-40)   | 38 (0-150)       | 23 (0-60)        |
| Ring         | <i>Mesocriconema</i> spp.           | 591 (0-4,666)                                                             | 319 (0-2,320) | 340 (30-2,040) | 41 (0-230)  | 3,650 (0-28,080) | 1,172 (70-2,440) |
| Root-knot    | <i>Meloidogyne</i> spp.             | 970 (0-11,640)                                                            | 560 (0-5,920) | 937 (0-9,760)  | -           | 1 (1-10)         | 1 (0-10)         |
| Soybean cyst | <i>Heterodera glycines</i> Ichinohe | 21 (0-300)                                                                | 8 (0-50)      | 5 (10-80)      | 22 (0-70)   | 12 (0-60)        | 7 (0-100)        |
| Spiral       | <i>Helicotylenchus</i> spp.         | 5 (0-50)                                                                  | 7 (0-80)      | 16 (0-120)     | 56 (0-120)  | 65 (0-250)       | 47 (0-200)       |
| Stubby root  | <i>Paratrichodorus</i> spp.         | 3 (0-33)                                                                  | 7 (0-50)      | 10 (0-70)      | 5 (0-80)    | 5 (0-40)         | 4 (0-20)         |
| Stunt        | <i>Tylenchorhynchus</i> spp.        | 71 (0-280)                                                                | 40 (0-120)    | 19 (0-160)     | 45 (0-280)  | 61 (0-160)       | 47 (0-200)       |

**Supplemental Table S2.** Analysis of variance for peanut yield and population of plant-parasitic nematodes in soil at Lewiston-Woodville in 2013.

| Source               | Peanut<br>(kg/ha) | yield | Plant-parasitic nematode taxa population |      |              |                 |        |        |       |
|----------------------|-------------------|-------|------------------------------------------|------|--------------|-----------------|--------|--------|-------|
|                      |                   |       | Lesion                                   | Ring | Root<br>knot | Soybean<br>cyst | Spiral | Stubby | Stunt |
| Tillage <sup>a</sup> | *                 |       | NS                                       | NS   | NS           | NS              | NS     | NS     | NS    |
| Rotation             | *                 |       | NS                                       | NS   | *            | NS              | NS     | NS     | NS    |
| Tillage<br>Rotation  | × NS              |       | NS                                       | NS   | NS           | NS              | NS     | NS     | NS    |

\*Indicates significance at  $p \leq 0.05$ . NS indicates not significant.

<sup>a</sup>Conventional tillage consisted of two passes with a disk harrow, one pass with a field cultivator, and bedding with in-row sub-soiling at a depth of 25 cm. Strip tillage consisted of fluted coulters, two rolling baskets, and in-row sub-soiling on a 45-cm band on 91-cm rows.

**Supplemental Table S3.** Analysis of variance for peanut yield and population of plant-parasitic nematodes at Rocky Mount in 2013.

| Source               | Peanut<br>(kg/ha) | yield | Plant-parasitic nematode taxa population in soil (No./cm <sup>3</sup> ) |        |      |                 |        |        |       |
|----------------------|-------------------|-------|-------------------------------------------------------------------------|--------|------|-----------------|--------|--------|-------|
|                      |                   |       | Dagger                                                                  | Lesion | Ring | Soybean<br>cyst | Spiral | Stubby | Stunt |
| Tillage <sup>a</sup> | *                 |       | NS                                                                      | NS     | NS   | NS              | NS     | NS     | *     |
| Rotation             | NS                |       | *                                                                       | NS     | *    | NS              | NS     | NS     | NS    |
| Tillage × Rotation   | NS                |       | NS                                                                      | NS     | NS   | NS              | NS     | NS     | NS    |

\*Indicates significance at  $p \leq 0.05$ . NS indicates not significant.

<sup>a</sup>Conventional tillage consisted of two passes with a disk harrow, one pass with a field cultivator, and bedding with in-row sub-soiling at a depth of 25 cm. Strip tillage consisted of fluted coulters, two rolling baskets, and in-row sub-soiling on a 45-cm band on 91-cm rows.

**Supplemental Table S4.** Analysis of variance for peanut yield, plant condition rating, and populations of plant-parasitic nematodes at harvest at Lewiston-Woodville in 2019 and 2022.<sup>a</sup>

| Source                                   | Peanut<br>yield | Plant<br>condition<br>rating <sup>b</sup> | Population of plant-parasitic nematode taxa |        |      |              |                 |        |        |       |
|------------------------------------------|-----------------|-------------------------------------------|---------------------------------------------|--------|------|--------------|-----------------|--------|--------|-------|
|                                          |                 |                                           | Dagger                                      | Lesion | Ring | Root<br>knot | Soybean<br>cyst | Spiral | Stubby | Stunt |
| 2019                                     |                 |                                           |                                             |        |      |              |                 |        |        |       |
| Rotation<br>length<br>(ROT)              | *               | *                                         | NS                                          | *      | NS   | *            | NS              | NS     | NS     | *     |
| Previous<br>crop (PC)                    | NS              | NS                                        | NS                                          | NS     | NS   | NS           | *               | *      | NS     | *     |
| Tillage<br>system <sup>b</sup><br>(TILL) | NS              | NS                                        | NS                                          | NS     | NS   | NS           | *               | NS     | NS     | NS    |
| Nematicide<br>(NEM)                      | NS              | NS                                        | NS                                          | NS     | NS   | NS           | NS              | NS     | NS     | NS    |
| ROT × TILL                               | NS              | NS                                        | NS                                          | NS     | NS   | NS           | NS              | NS     | NS     | *     |
| ROT ×<br>NEM                             | NS              | NS                                        | NS                                          | NS     | NS   | NS           | NS              | NS     | NS     | NS    |
| TILL ×<br>NEM                            | NS              | NS                                        | NS                                          | NS     | NS   | NS           | NS              | *      | NS     | NS    |
| ROT × PC                                 | NS              | NS                                        | *                                           | *      | NS   | NS           | NS              | NS     | NS     | NS    |
| PC × TILL                                | NS              | NS                                        | NS                                          | NS     | NS   | NS           | NS              | NS     | NS     | NS    |
| PC × NEM                                 | NS              | NS                                        | NS                                          | NS     | NS   | NS           | NS              | NS     | NS     | NS    |
| ROT × TILL<br>× NEM                      | NS              | NS                                        | NS                                          | NS     | NS   | NS           | NS              | *      | NS     | NS    |
| ROT × PC ×<br>TILL                       | NS              | *                                         | NS                                          | NS     | NS   | NS           | NS              | NS     | NS     | NS    |
| ROT × PC ×<br>NEM                        | NS              | NS                                        | NS                                          | NS     | NS   | NS           | NS              | NS     | NS     | NS    |
| ROT × PCL<br>× TILL ×<br>NEM             | NS              | NS                                        | NS                                          | NS     | NS   | NS           | NS              | NS     | NS     | NS    |
| 2022                                     |                 |                                           |                                             |        |      |              |                 |        |        |       |
| Rotation<br>length<br>(ROT)              | *               | NS                                        | NS                                          | NS     | NS   | *            | NS              | NS     | NS     | NS    |
| Previous<br>crop (PC)                    | NS              | NS                                        | *                                           | NS     | NS   | NS           | *               | NS     | NS     | NS    |

|                        |    |    |    |    |    |    |    |    |    |    |
|------------------------|----|----|----|----|----|----|----|----|----|----|
| Tillage system (TILL)  | NS | *  | NS |
| Nematicide (NEM)       | NS | NS | NS | NS | NS | *  | *  | NS | NS | NS |
| ROT × TILL             | NS |
| ROT × NEM              | NS |
| TILL × NEM             | NS |
| ROT × PC               | NS |
| PC × TILL              | NS |
| PC × NEM               | NS |
| ROT × TILL × NEM       | NS |
| ROT × PC × TILL        | NS |
| ROT × PC × NEM         | NS |
| ROT × PCL × TILL × NEM | NS | NS | NS | NS | NS | *  | NS | NS | NS | NS |

<sup>a</sup>\*Indicates significance at  $p \leq 0.05$ . NS indicates not significant.

<sup>a</sup>Visual estimate of plant condition rating based on an ordinal scale of 0-5 where 0 = canopy foliage yellow in color and 5 = deep green color of foliage.

<sup>b</sup>Conventional tillage consisted of two passes with a disk harrow, one pass with a field cultivator, and bedding with in-row sub-soiling at a depth of 25 cm. Strip tillage consisted of fluted coulters, two rolling baskets, and in-row sub-soiling on a 45-cm band on 91-cm rows.

**Supplemental Table S5.** Analysis of variance for peanut yield, plant condition rating, and populations of plant-parasitic nematodes at harvest at Rocky Mount in 2019 and 2022.<sup>a</sup>

| Source                                   | Peanut<br>yield | Plant<br>condition<br>rating <sup>b</sup> | Population of plant parasitic nematodes taxa |        |      |                 |        |        |       |       |
|------------------------------------------|-----------------|-------------------------------------------|----------------------------------------------|--------|------|-----------------|--------|--------|-------|-------|
|                                          |                 |                                           | Dagger                                       | Lesion | Ring | Soybean<br>cyst | Spiral | Stubby | Sting | Stunt |
| 2019                                     |                 |                                           |                                              |        |      |                 |        |        |       |       |
| Rotation<br>length<br>(ROT)              | NS              | NS                                        | *                                            | NS     | *    | NS              | NS     | NS     | -     | NS    |
| Tillage<br>system <sup>b</sup><br>(TILL) | *               | *                                         | NS                                           | NS     | NS   | *               | NS     | NS     | -     | NS    |
| Nematicide<br>(NEM)                      | NS              | NS                                        | NS                                           | NS     | NS   | NS              | NS     | NS     | -     | NS    |
| ROT × TILL                               | NS              | *                                         | NS                                           | NS     | NS   | NS              | NS     | NS     | -     | NS    |
| ROT × NEM                                | NS              | NS                                        | *                                            | NS     | NS   | NS              | NS     | NS     | -     | NS    |
| TILL × NEM                               | NS              | NS                                        | NS                                           | NS     | NS   | NS              | NS     | NS     | -     | NS    |
| ROT × TILL<br>× NEM                      | NS              | NS                                        | NS                                           | NS     | NS   | NS              | NS     | NS     | -     | NS    |
| 2022                                     |                 |                                           |                                              |        |      |                 |        |        |       |       |
| Rotation<br>length<br>(ROT)              | NS              | NS                                        | NS                                           | NS     | NS   | *               | NS     | NS     | NS    | NS    |
| Tillage<br>system<br>(TILL)              | *               | NS                                        | NS                                           | NS     | NS   | NS              | NS     | NS     | NS    | NS    |
| Nematicide<br>(NEM)                      | NS              | NS                                        | NS                                           | NS     | NS   | NS              | NS     | NS     | NS    | NS    |
| ROT × TILL                               | NS              | NS                                        | NS                                           | NS     | NS   | NS              | NS     | NS     | NS    | NS    |
| ROT × NEM                                | NS              | NS                                        | NS                                           | NS     | NS   | NS              | NS     | NS     | NS    | NS    |
| TILL × NEM                               | NS              | NS                                        | NS                                           | NS     | NS   | NS              | NS     | *      | NS    | NS    |
| ROT × TILL<br>× NEM                      | NS              | NS                                        | NS                                           | NS     | NS   | NS              | NS     | NS     | NS    | NS    |

<sup>a</sup>\*Indicates significance at  $p \leq 0.05$ . NS indicates not significant.

---

<sup>a</sup>Visual estimate of plant condition rating based on an ordinal scale of 0-5 where 0 = canopy foliage yellow in color and 5 = deep green color of foliage.

<sup>b</sup>Conventional tillage consisted of two passes with a disk harrow, one pass with a field cultivator, and bedding with in-row sub-soiling at a depth of 25 cm. Strip tillage consisted of fluted coulters, two rolling baskets, and in-row sub-soiling on a 45-cm band on 91-cm rows.
